# Supplementary material for: Insecticide Exposure and Risk of Asthmatic Symptoms: A Systematic Review and Meta-Analysis
Source: MDPI journal article supplement (doi:10.3390/toxics9090228), 2021-09-21
Supplement: s1 [file s1]

# Supplementary Materials: Insecticide Exposure and Risk of Asthmatic Symptoms: A Systematic Review and Meta-Analysis

Jiraporn Chittrakul, Ratana Sapbamrer \* and Wachiranun Sirikul

**Table S1.** The National, Heart, Lung and Blood Institute (NIH) criteria for cohort and cross-sectional studies.

| Study                          | Criteria |     |     |     |     |     |     |     |     |     |     |     |     |     | Total |
|--------------------------------|----------|-----|-----|-----|-----|-----|-----|-----|-----|-----|-----|-----|-----|-----|-------|
|                                | 1        | 2   | 3   | 4   | 5   | 6   | 7   | 8   | 9   | 10  | 11  | 12  | 13  | 14  |       |
| <b>Cohort studies</b>          |          |     |     |     |     |     |     |     |     |     |     |     |     |     |       |
| Hoppin et.al                   | yes      | yes | no  | yes | yes | yes | yes | yes | yes | no  | yes | yes | yes | yes | good  |
| Cherry N. et al.               | yes      | yes | no  | yes | good  |
| <b>Cross-sectional studies</b> |          |     |     |     |     |     |     |     |     |     |     |     |     |     |       |
| Senthilselvan et.al            | yes      | yes | yes | yes | yes | yes | yes | yes | yes | no  | yes | CD  | CD  | yes | good  |
| Faria et al.                   | yes      | yes | yes | yes | yes | yes | yes | yes | yes | no  | yes | CD  | CD  | yes | good  |
| Patel et al.                   | yes      | yes | no  | yes | yes | yes | yes | yes | yes | no  | yes | CD  | CD  | yes | good  |
